# Supplementary material
Source: PubMed Central journal article supplement (PMC9308680)
Supplement: NIHMS1796867-supplement-1.pdf [file NIHMS1796867-supplement-1.pdf]

## Supplemental Material

Supplemental Table SI. Patients' characteristics

| Characteristic (unit)   | Measure or category                 | Overall            |
|-------------------------|-------------------------------------|--------------------|
| Age (years)             | Median [range]                      | 59 [44 – 68]       |
| WBC ( $\times 10^9/l$ ) | Median [range]                      | 27 [12 – 79]       |
| ALC ( $\times 10^9/l$ ) | Median [range]                      | 23 [4 – 65]        |
| Rai stage (%)           | 0-2 / 3-4                           | 95 / 5             |
| CD38 (%)                | $\leq 30$ / $> 30$                  | 81 / 19            |
| Zap-70 (%)              | Negative / Positive                 | 66 / 34            |
| $\beta 2M$ (%)          | $< 4$ mg/l / $\geq 4$ mg/l          | 95 / 5             |
| IGHV mutation (%)       | M / UM                              | 80 / 20            |
| FISH result, n          | del17p / 11q / T12 / 13q / Negative | 1 / 2 / 2 / 16 / 4 |
| Survival status, n      | Alive / Dead                        | 27 / 0             |

Abbreviations: WBC, white blood cell count; ALC, absolute lymphocyte count;  $\beta 2M$ , beta-2 microglobulin; M, mutated; UM, unmutated; FISH, fluorescence *in situ* hybridization.

**Supplemental Table SII. Antibodies, PCR primers/probes, and small interfering RNAs (siRNAs) used in the PTX3 activity experiments**

| Target [fluorescent label]                             | Clone or assay ID | Manufacturer              | Catalog no.     |
|--------------------------------------------------------|-------------------|---------------------------|-----------------|
| <b>Western immunoblotting antibodies</b>               |                   |                           |                 |
| PTX3                                                   | MNB1              | Hycult Biotech            | HM2241          |
| pSTAT3 (Ser727)                                        | <i>Polyclonal</i> | Cell Signaling Technology | 9134            |
| STAT3                                                  | 84/Stat3          | BD Biosciences            | 610190          |
| $\beta$ -actin                                         | AC-15             | Sigma-Aldrich             | A5441           |
| <b>Flow cytometry antibodies</b>                       |                   |                           |                 |
| PTX3 [Alexa Fluor 488]                                 | MM0512-6B7        | Novus Biologicals         | NBP2-11849AF488 |
| CD5 [PE]                                               | UCHT2             | BD Biosciences            | 555353          |
| CD19 [PerCP]                                           | 4G7               | BD Biosciences            | 340865          |
| pSTAT3 (Ser727) [Alexa Fluor 647]                      | 49/p-Stat3        | BD Biosciences            | 558099          |
| <b>Confocal microscopy antibodies</b>                  |                   |                           |                 |
| PTX3                                                   | <i>Polyclonal</i> | Lifespan Biosciences      | LS-C330046      |
| STAT3                                                  | 84/Stat3          | BD Biosciences            | 610189          |
| Rabbit IgG [Alexa Fluor 647]                           | <i>Polyclonal</i> | Invitrogen                | A-31573         |
| Mouse IgG [Alexa Fluor 488]                            | <i>Polyclonal</i> | Invitrogen                | A-11029         |
| <b>PCR primers with FAM dye-labeled probes</b>         |                   |                           |                 |
| STAT3                                                  | Hs00374280_m1     | Thermo Fisher Scientific  | 4331182         |
| Bcl2                                                   | Hs00608023_m1     | Thermo Fisher Scientific  | 4331182         |
| CASP3                                                  | Hs00234385_m1     | Thermo Fisher Scientific  | 4331182         |
| CSF2R- $\alpha$                                        | Hs00531296_g1     | Thermo Fisher Scientific  | 4331182         |
| c-Myc                                                  | Hs00153408_m1     | Thermo Fisher Scientific  | 4331182         |
| Cyclin D1                                              | Hs00765553_m1     | Thermo Fisher Scientific  | 4331182         |
| LPL                                                    | Hs00173425_m1     | Thermo Fisher Scientific  | 4331182         |
| p21                                                    | Hs01040810_m1     | Thermo Fisher Scientific  | 4331182         |
| ROR1                                                   | Hs00178178_m1     | Thermo Fisher Scientific  | 4331182         |
| PTX3                                                   | Hs00173615_m1     | Thermo Fisher Scientific  | 4331182         |
| GAPDH                                                  | Hs02786624_g1     | Thermo Fisher Scientific  | 4331182         |
| <b>Chromatin immunoprecipitation (ChIP) antibodies</b> |                   |                           |                 |
| STAT3                                                  | 79D7              | Cell Signaling Technology | 4904            |
| IgG                                                    | <i>Polyclonal</i> | Cell Signaling Technology | 2729            |
| <b>siRNAs</b>                                          |                   |                           |                 |
| PTX3                                                   | -                 | Thermo Fisher Scientific  | AM16708         |
| Negative Control No. 1                                 | -                 | Thermo Fisher Scientific  | AM4611          |
| GAPDH [FAM]                                            | -                 | Thermo Fisher Scientific  | AM4650          |

**Supplemental Table SIII. Primers and probes used in the STAT3-to-DNA binding assays**

| GAS-like elements                                 | Position* (bp) | Length (bp) | Primers or probe                                                                |
|---------------------------------------------------|----------------|-------------|---------------------------------------------------------------------------------|
| <b>Chromatin immunoprecipitation (ChIP) assay</b> |                |             |                                                                                 |
| 1 and 2                                           | -271 → -168    | 104         | Forward: 5'-TTGGGAAGCTGAGGTAGGAGA-3'<br>Reverse: 5'-TGAGGAGTTGCACCTATACTTTT-3'  |
| 3                                                 | -617 → -548    | 70          | Forward: 5'-AAAAGTATAGGTGCAACTCCTCA-3'<br>Reverse: 5'-TGGCTCTGAAAGTCAAGTCCAA-3' |
| 4                                                 | -746 → -595    | 152         | Forward: 5'-TGA CTGCAGCGTAAACCTTTG-3'<br>Reverse: 5'-AACGGGAGTCCCCTGAATTT-3'    |
| <b>Electromobility shift assay (EMSA)</b>         |                |             |                                                                                 |
| 1                                                 | -190 → -171    | 20          | CCAAATTCAGGGGA ACTCCC                                                           |
| 2                                                 | -246 → -227    | 20          | TTAATATTGTGCAACTTCCA                                                            |
| 3                                                 | -595 → -576    | 20          | AAGTATTAAGACAAGATAG                                                             |
| 4                                                 | -630 → -611    | 20          | AAAAATTATCTATAAAAAGTA                                                           |
| <b>Dual-reporter luciferase assay</b>             |                |             |                                                                                 |
| 1, 2, 3, and 4                                    | -746 → 0       | 746         | Forward: 5'-TTGGGAAGCTGAGGTAGGAGA-3'<br>Reverse: 5'-TGCTGGAGAGACGCAAAGTT-3'     |
| 1 and 2                                           | -597 → 0       | 597         | Forward: 5'-AGCTCGGATTGACTT GACTT-3'<br>Reverse: 5'-TGCTGGAGAGACGCAAAGTT-3'     |
| 1                                                 | -230 → 0       | 230         | Forward: 5'-TCCACATTTCCCTCGCTCTC-3'<br>Reverse: 5'-TGCTGGAGAGACGCAAAGTT-3'      |
| -                                                 | -140 → 0       | 140         | Forward: 5'-CATCCCCATT CAGGCTTTCCT-3'<br>Reverse: 5'-TGCTGGAGAGACGCAAAGTT-3'    |

Abbreviations: GAS, gamma-interferon activated sequence.  
\*Position from the PTX3 gene start codon.
